# Supplementary material
Source: PubMed Central journal article supplement (PMC3662405)

## Closer Insight into the Reactivity of TMP-dialkyl Zincates in Directed ortho-Zincation of Anisole: Experimental Evidence of Amido Basicity and Structural Elucidation of Key Reaction Intermediates

William Clegg,<sup>b</sup> Ben Conway,<sup>a</sup> Eva Hevia,<sup>\*a</sup> Matthew D. McCall,<sup>a</sup> Luca Russo<sup>b</sup> and Robert E. Mulvey<sup>a</sup>

<sup>a</sup>WestCHEM, Department of Pure and Applied Chemistry, University of Strathclyde, Glasgow, UK, G1 1XL. E-mail: [eva.hevia@strath.ac.uk](mailto:eva.hevia@strath.ac.uk)

<sup>b</sup>School of Chemistry, University of Newcastle, Newcastle upon Tyne NE1 7RU, U.K.

### Molecular structure of compound 6

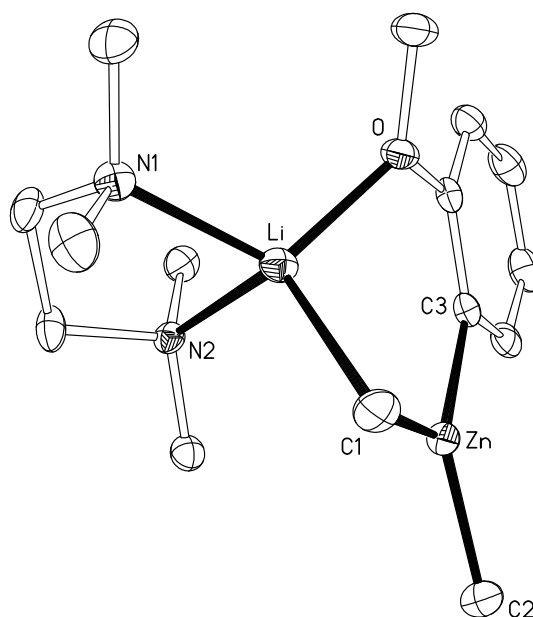

**Figure 1.** Molecular structure of **6** with 50% probability displacement ellipsoids. Hydrogen atoms have been omitted for clarity. Selected bond distances (Å) and bond angles (deg): Zn–C1 2.048(3), Zn–C2 2.016(3), Zn–C3 2.045(2), Li–C1 2.290(4), Li–N1 2.144(4), Li–N2 2.108(4), Li–O 1.960(4); C1–Zn–C2 121.09(10), C1–Zn–C3 122.71(10), C2–Zn–C3 116.20(11), C1–Li–N1 113.90(18), C1–Li–N2 114.34(18), C1–Li–O 107.24(17), N1–Li–N2 86.96(14), N1–Li–O 115.07(19), N2–Li–O 118.55(19).

Zincate **6** constitutes the first example of a putative intermediate formed in the first step of a two-step AMMZ reaction of an aromatic molecule to be structurally defined and fully characterised. Its molecular structure can be considered a contacted ion pair and can be viewed as a six-membered [LiOCCZnC] ring system where both metals are connected through a shared methyl and an *ortho*-deprotonated anisole ligand set. The latter anion coordinates to the mixed-metal {Li(Me)Zn(Me)} fragment in an ambidentate fashion, through the carbon-zinc strong, short covalent bond [2.045(2) Å] and the oxygen-lithium dative bond [1.960(4) Å]. This two-fold coordination mode is analogous to that found in the compound [(THF)Li(C<sub>6</sub>H<sub>4</sub>-OMe)(TMP)Zn(<sup>t</sup>Bu)] (**2**) [Zn-C<sub>anisole</sub> bond distance: 2.0937(16) Å; Li-O<sub>anisole</sub> bond distance: 1.985(3) Å],<sup>6</sup> the product of the direct zincation of anisole by base **1**. The bridging methyl group is strongly bound to zinc as evidenced by the short distance [2.048(3) Å] and surprisingly it also forms a medium-short Li-C bond [2.290(4) Å]. This bond is remarkably shorter (by 0.313 Å) than that found in the related dimethyl-TMP zincate [(TMEDA)Li(TMP)(Me)Zn(Me)]<sup>1</sup> [2.603(5) Å] where the methyl group forms a secondary agostic interaction with the lithium center and it is more comparable with those found in [{LiMe(THF)}<sub>4</sub>]<sup>2</sup> [mean Li-C distance 2.240 Å]. However, it should be noted that in solution at ambient temperature this Li-C bond must cleave since both methyl groups appear equivalent in the <sup>1</sup>H and <sup>13</sup>C NMR spectra. Trigonal planar zinc completes its coordination by bonding to a terminal methyl group, at a distance [2.016(3) Å] slightly shorter than the Zn-C bridging bond length. The lithium coordination is distorted tetrahedral [average angle around Li: 109.34°] with its terminal sites filled by the chelating diamine TMEDA. A similar structure to the one exhibited by **6** could be expected for the THF-solvated mixed-metal compound **4** where the TMEDA ligand is replaced by two THF molecules.<sup>3</sup> It is noteworthy that **6** is stable in hexane solution and does not undergo disproportionation. This could be due to the bidentate stabilisation provided by the TMEDA ligand which makes compound **6** more robust and therefore less prone to cleavage and rearrangement.

---

1 Graham, D. V.; Hevia, E.; Kennedy, A. R.; Mulvey, R. E. *Organometallics*, **2006**, *25*, 3297.

2 Ogle, C. A.; Huckabee, B. K.; Johnson IV, H. C.; Sims, P.F.; Winslow, S. D.; Pinkerton, A. A. *Organometallics*, **1993**, *12*, 1960.

3 This is supported by the fact that both compounds displayed very similar <sup>1</sup>H, <sup>13</sup>C and <sup>7</sup>Li NMR spectra.

NMR spectra**Compound [(THF)Li(C<sub>6</sub>H<sub>4</sub>-OMe)(TMP)Zn(<sup>t</sup>Bu)](2)**<sup>1</sup>H NMR spectrum in C<sub>6</sub>D<sub>6</sub>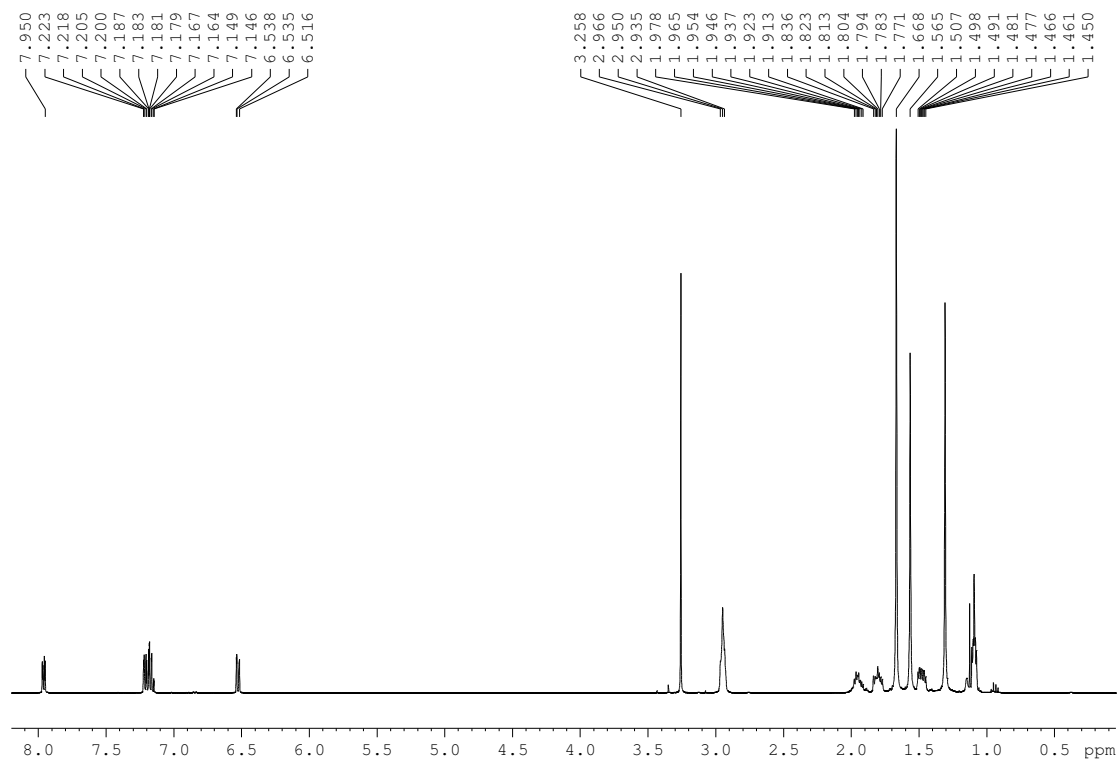<sup>7</sup>Li NMR spectrum in C<sub>6</sub>D<sub>6</sub>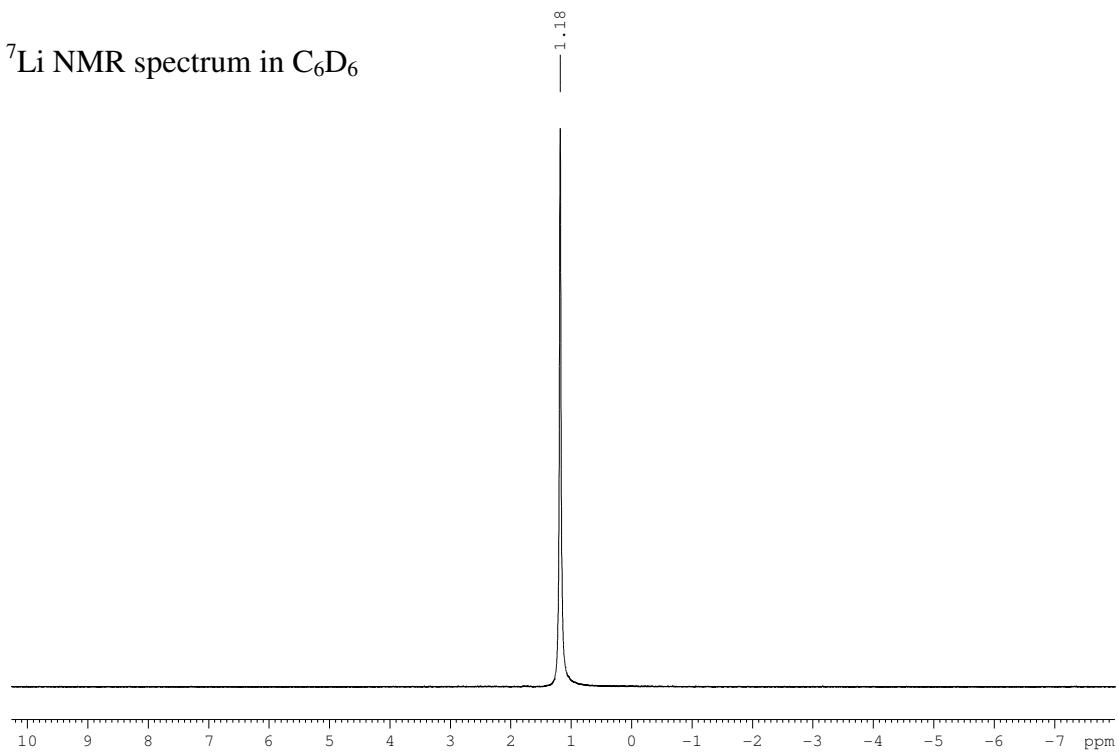

$^1\text{H}$  NMR in THF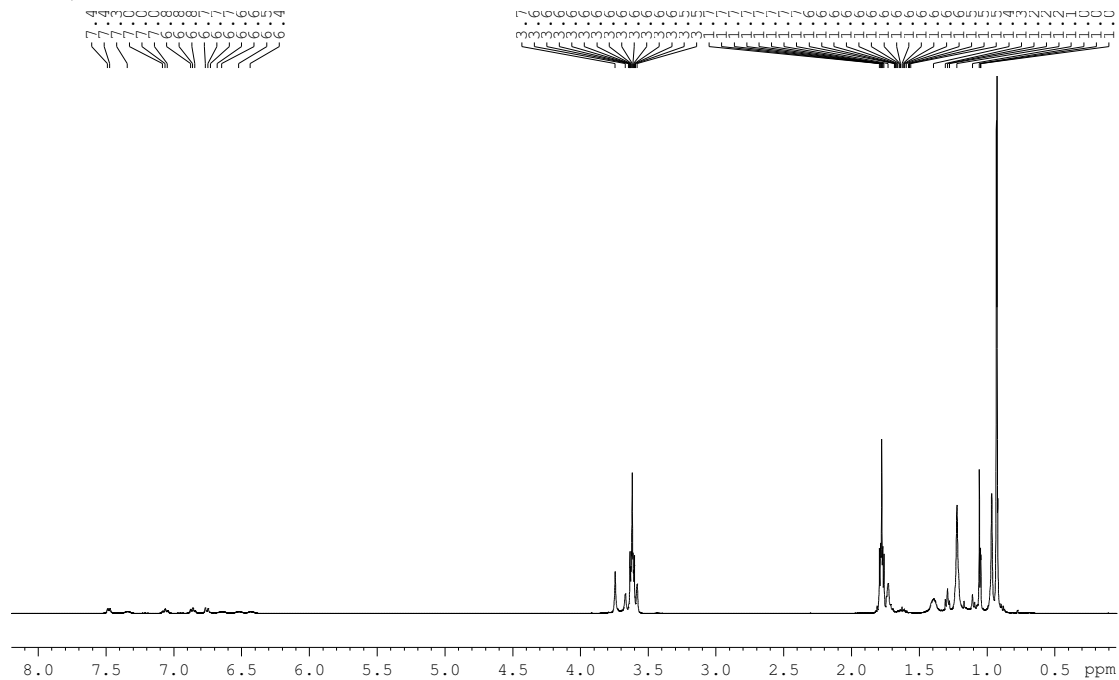Compound  $[\text{Li}_4(\text{C}_6\text{H}_4\text{-OMe})_4(\text{THF})_2]$  (3) $^1\text{H}$ ,  $^7\text{Li}$  and  $^{13}\text{C}$  NMR spectra in  $\text{C}_6\text{D}_6$ 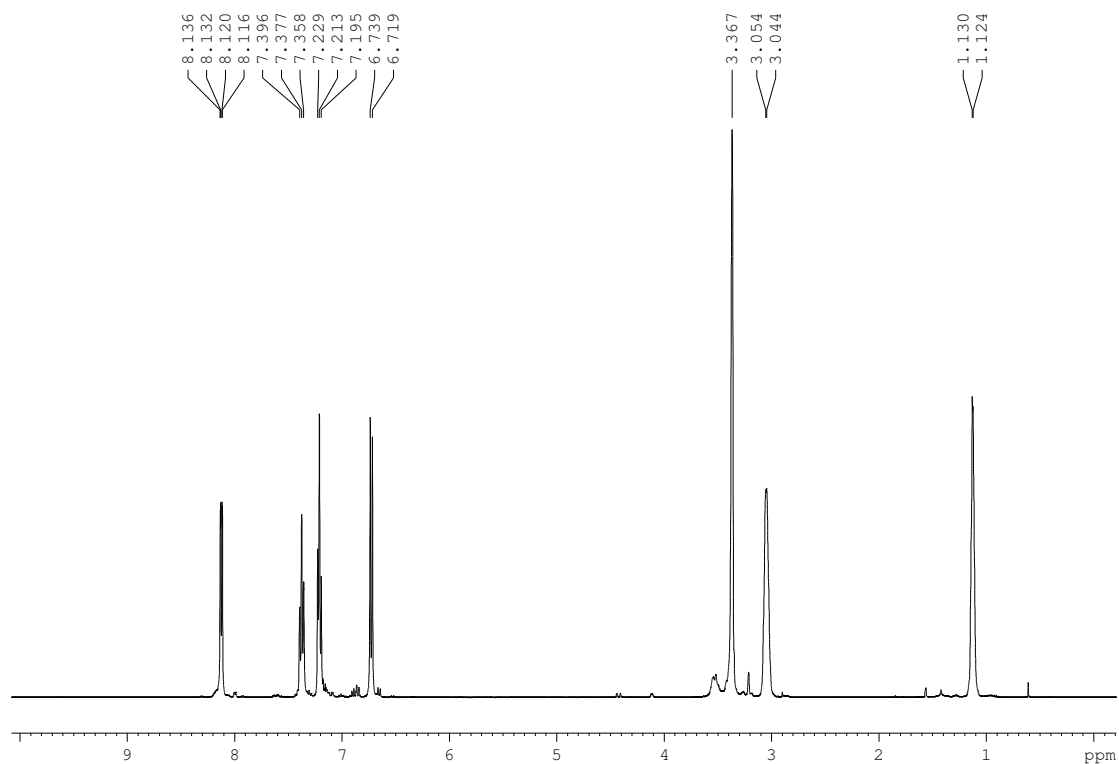

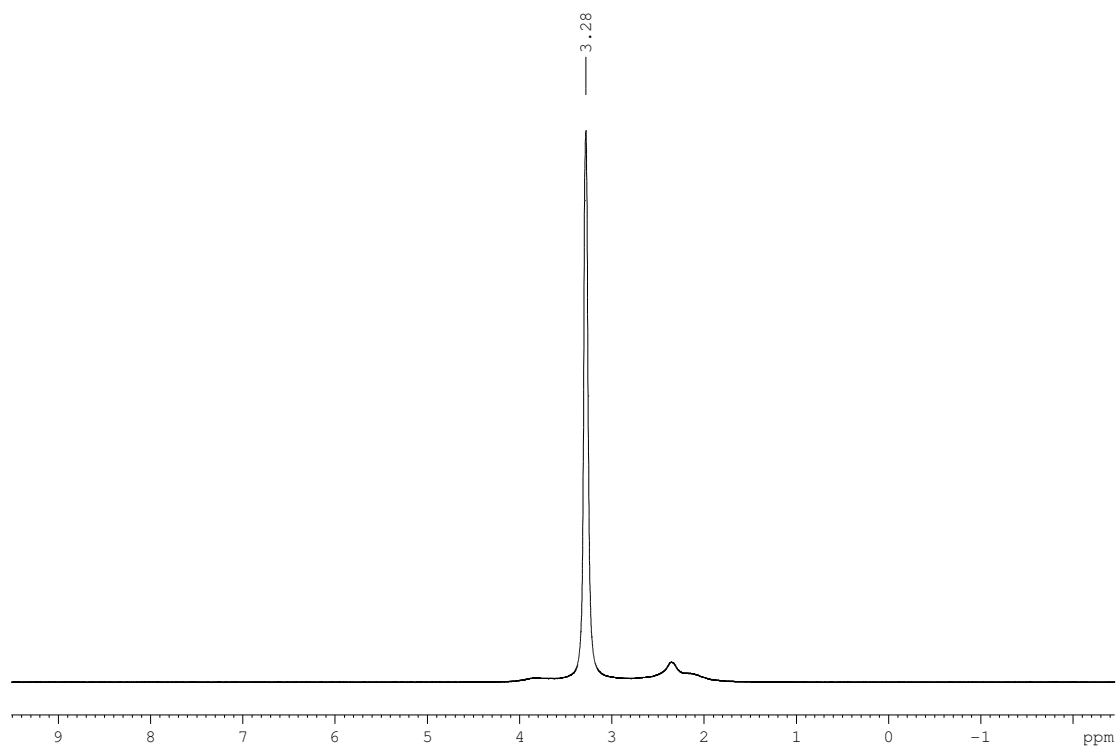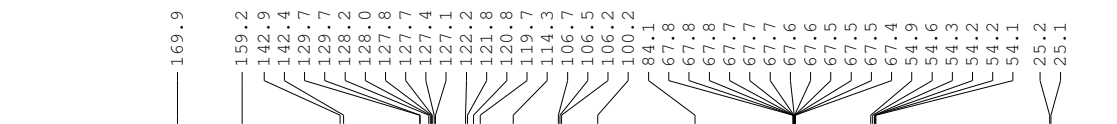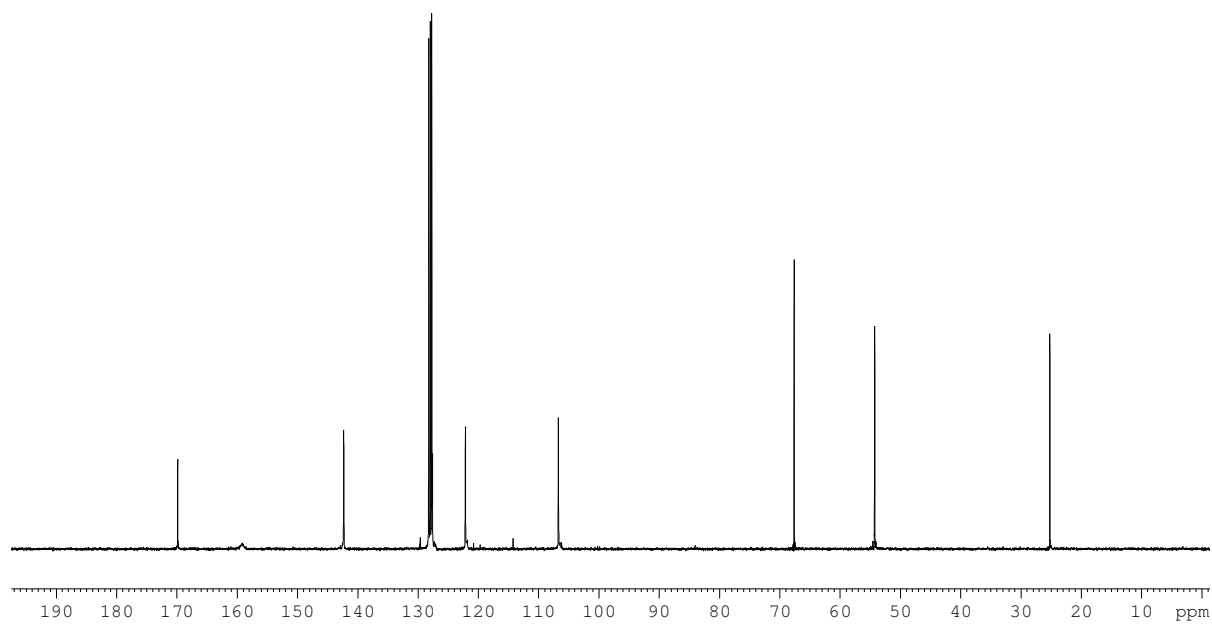

Compound [(THF)<sub>2</sub>Li(C<sub>6</sub>H<sub>4</sub>-OMe)(Me)Zn(Me)](4)<sup>1</sup>H, <sup>7</sup>Li and <sup>13</sup>C spectra in C<sub>6</sub>D<sub>6</sub>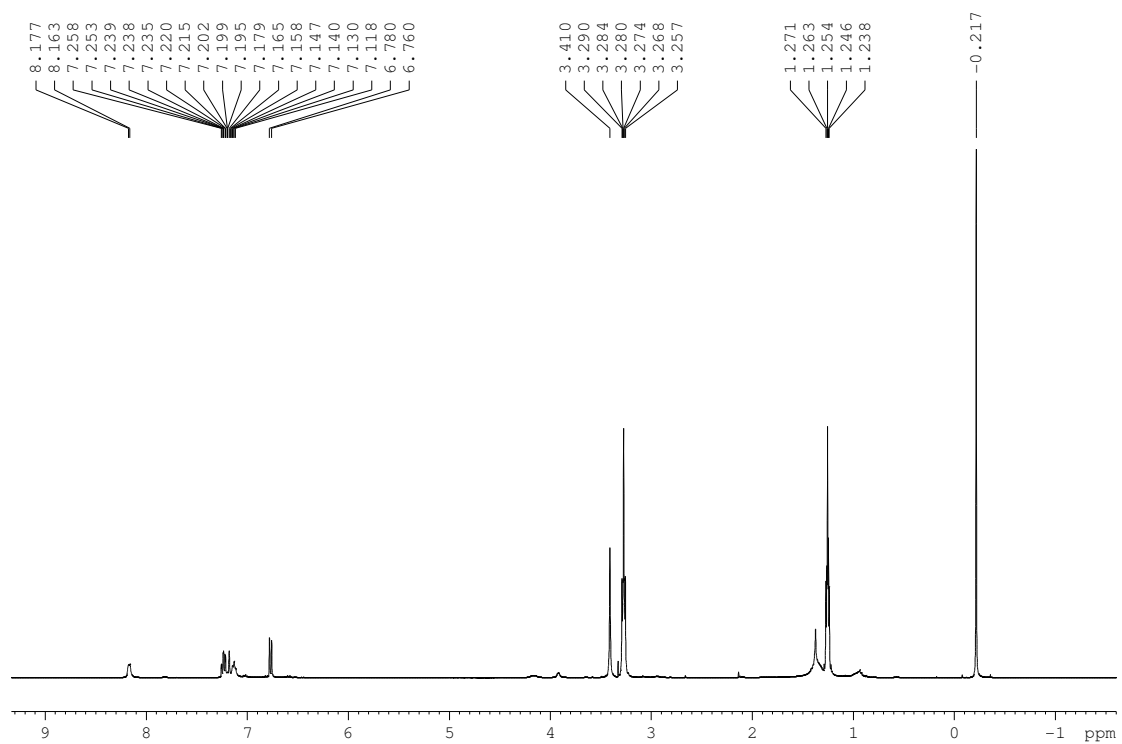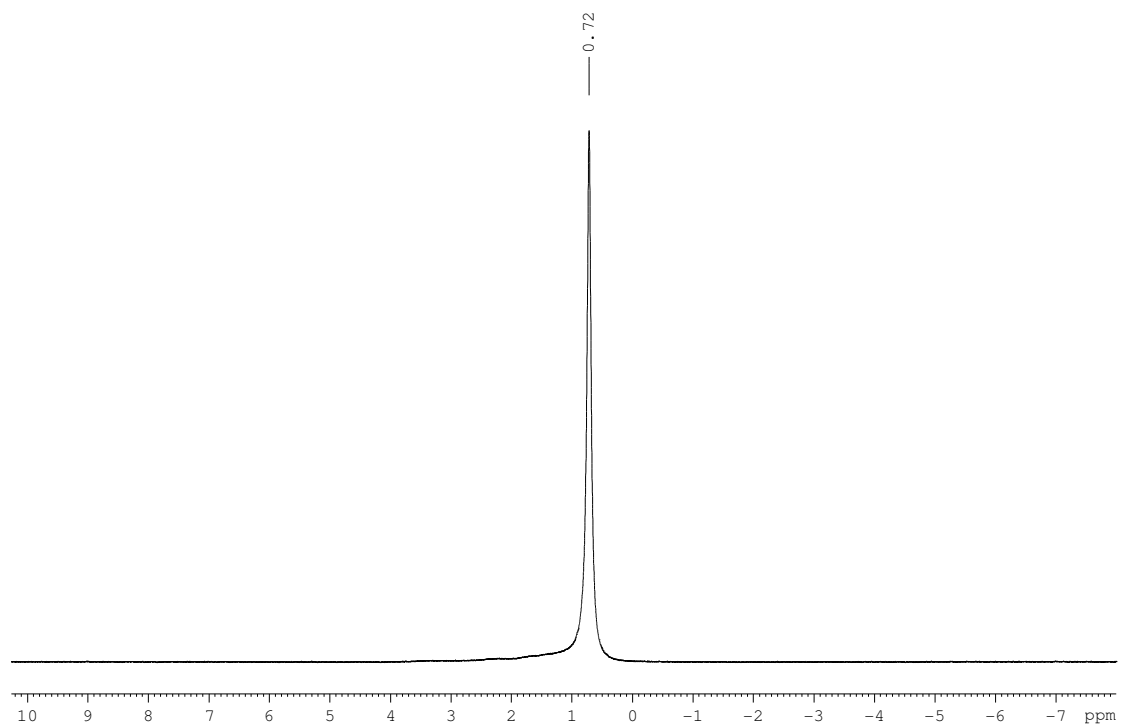

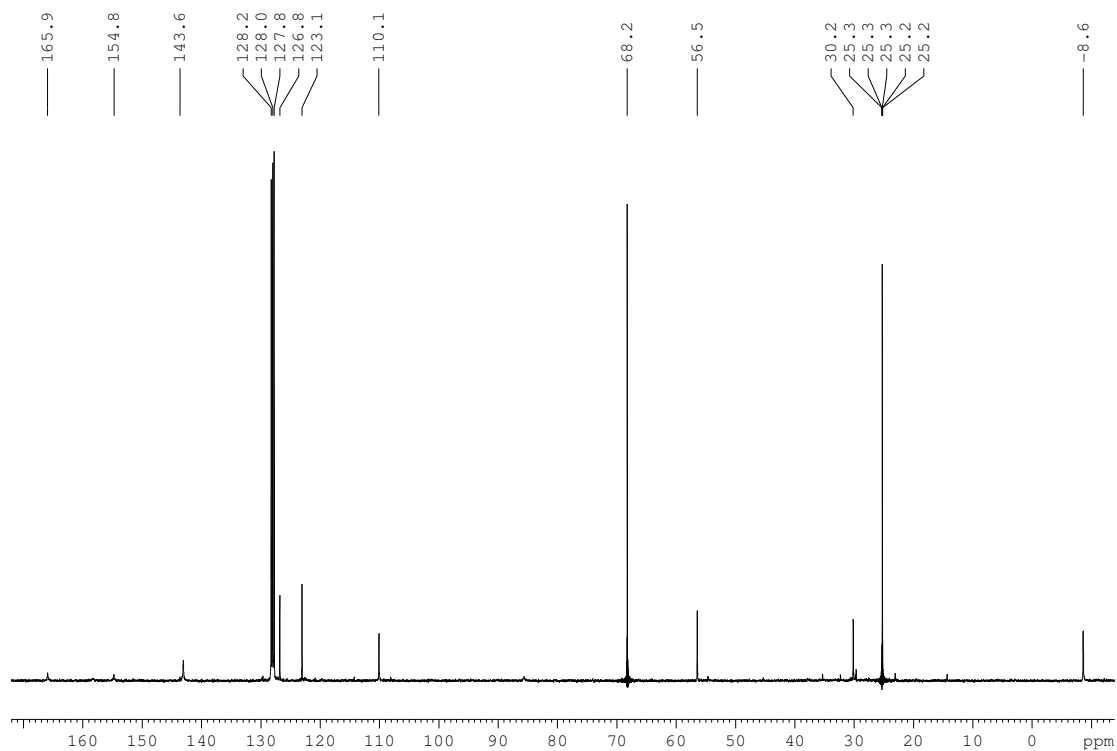

**Compound [(THF)<sub>2</sub>Li<sub>2</sub>Zn(C<sub>6</sub>H<sub>4</sub>-OMe)<sub>4</sub>](5)**

<sup>1</sup>H, <sup>7</sup>Li NMR spectra in C<sub>6</sub>D<sub>6</sub>

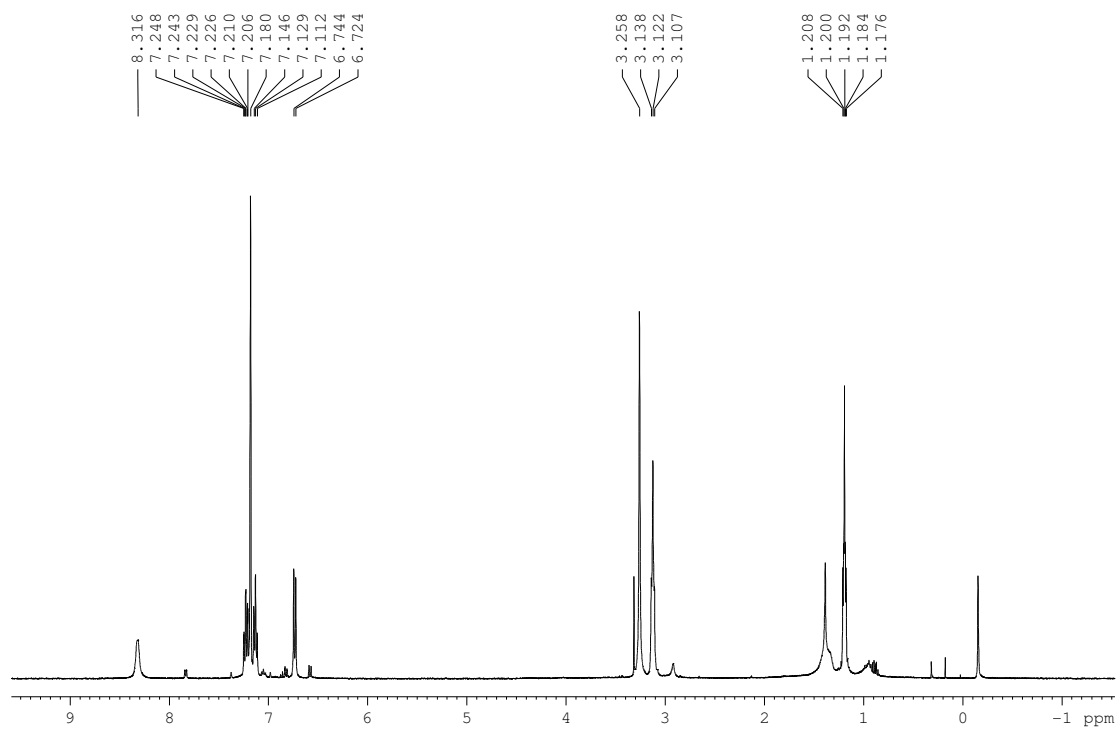

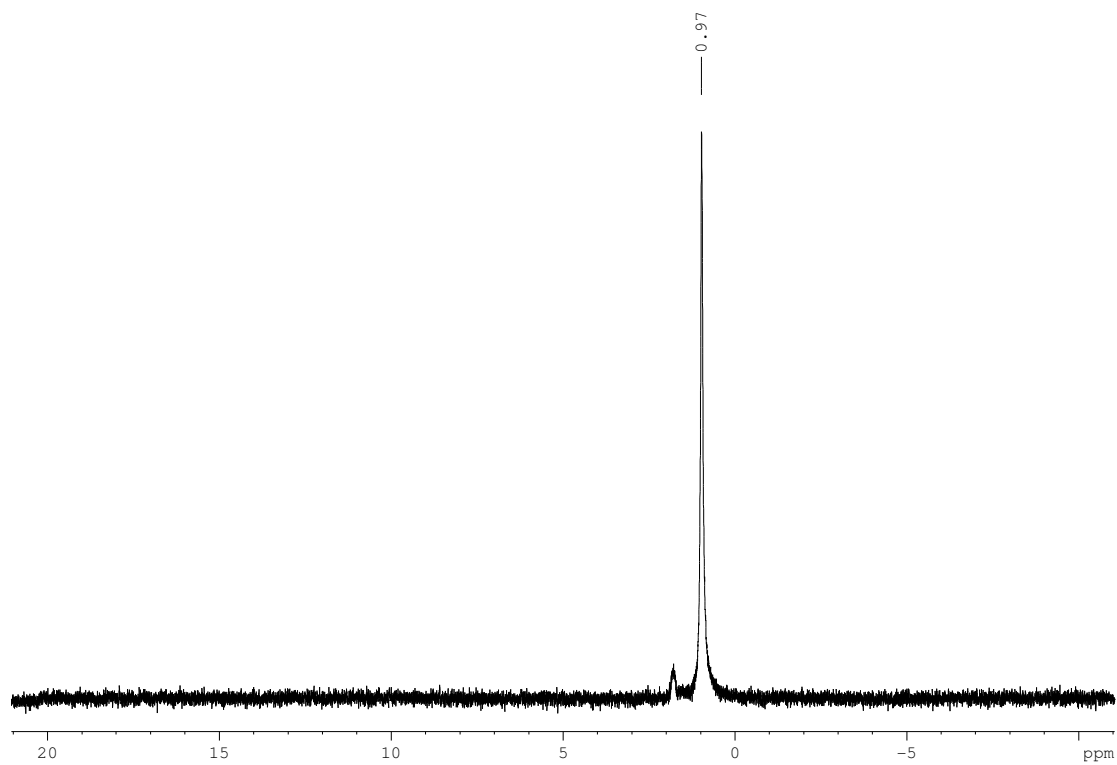**Compound [(TMEDA)Li(C<sub>6</sub>H<sub>4</sub>-OMe)(Me)Zn(Me)](6)** $^1\text{H}$ ,  $^7\text{Li}$  and  $^{13}\text{C}$  NMR spectra in  $\text{C}_6\text{D}_6$ 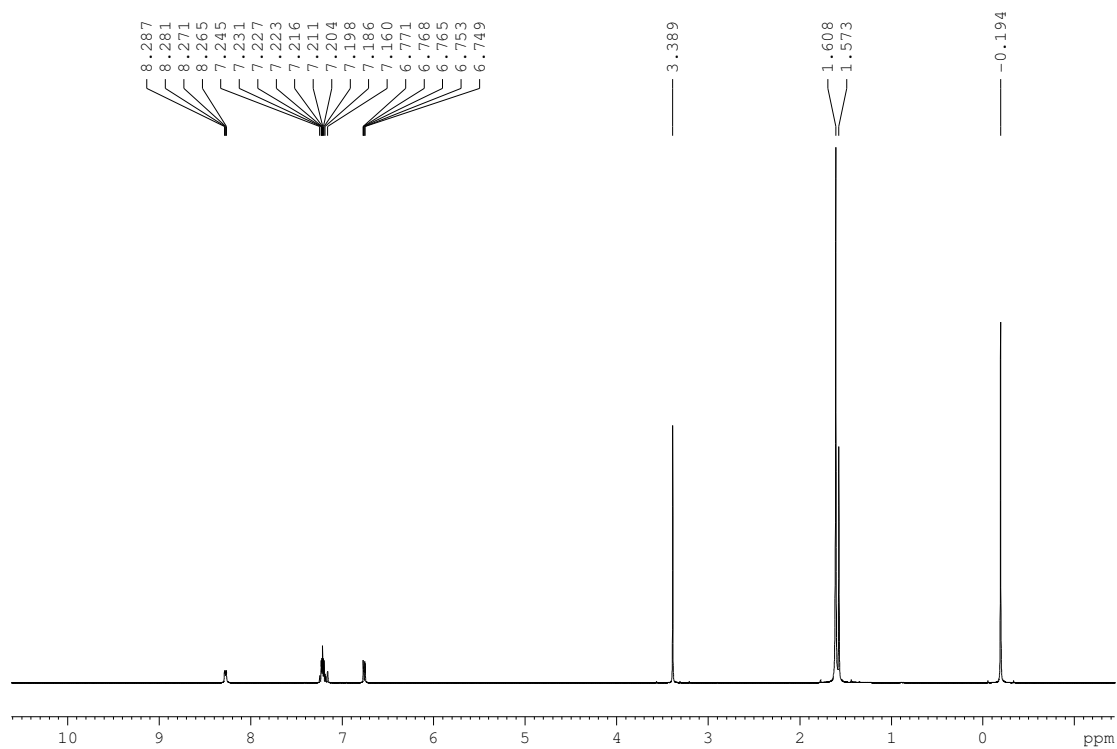



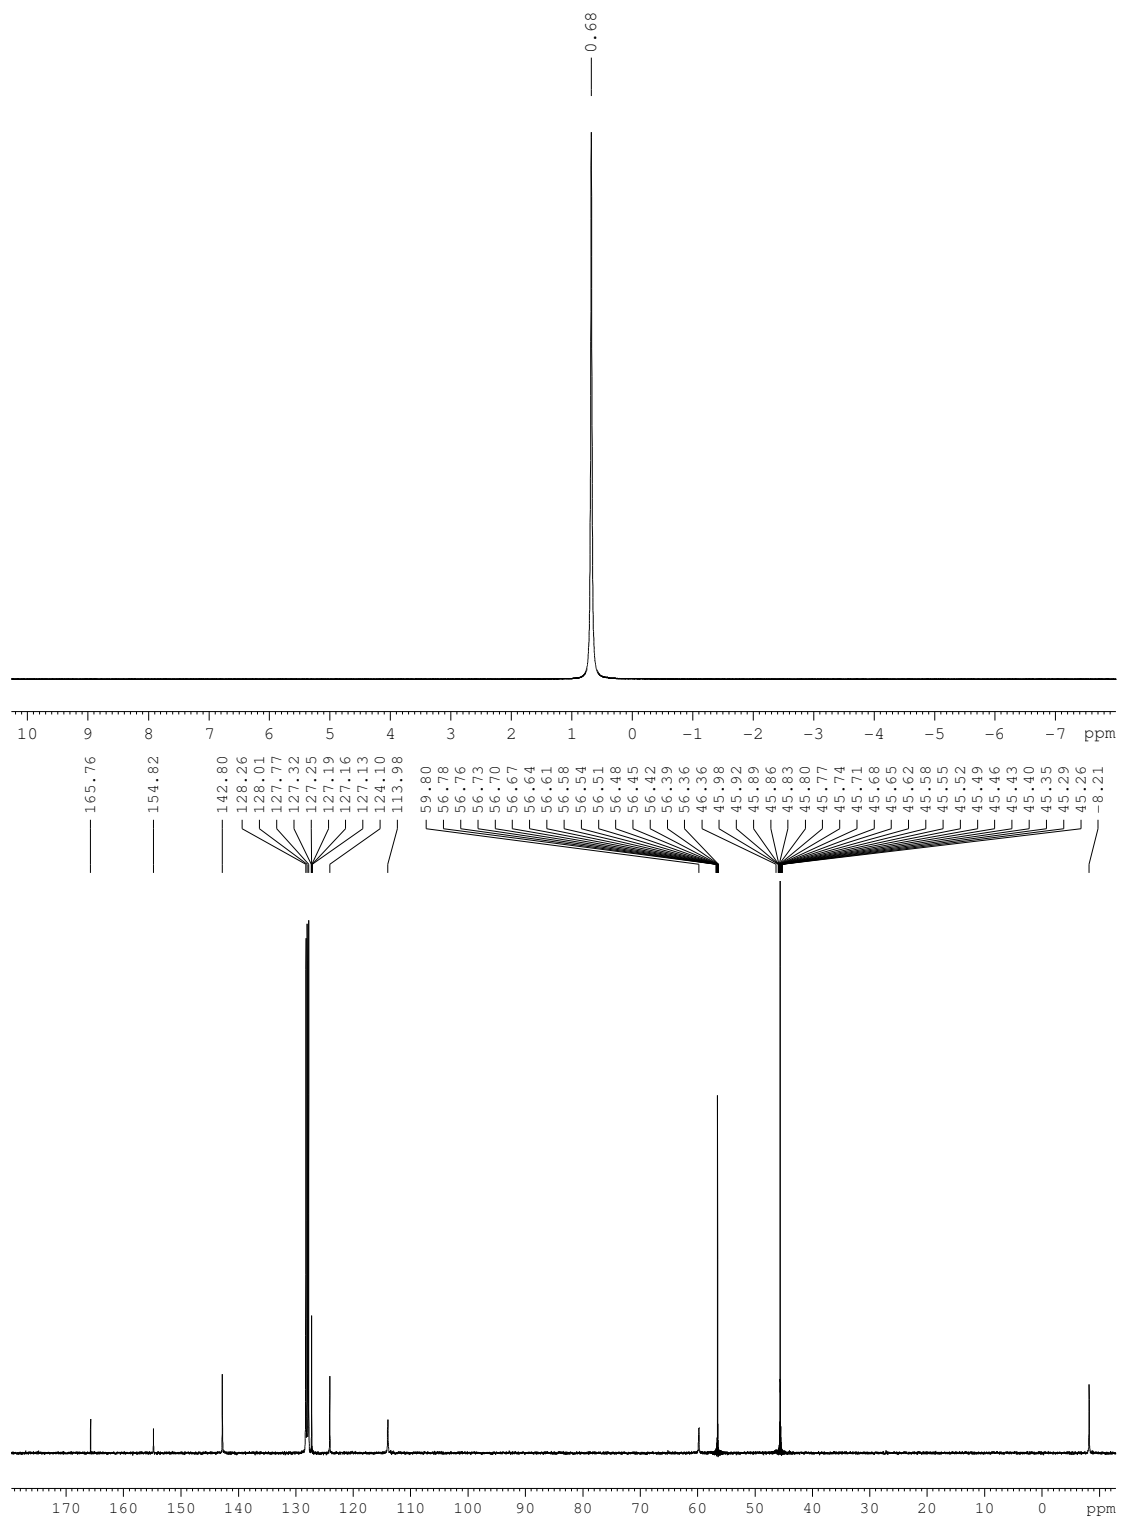

**Compound [(THF)<sub>3</sub>Li(C<sub>6</sub>H<sub>4</sub>-OMe)<sup>t</sup>Bu)Zn(<sup>t</sup>Bu)](7)**<sup>1</sup>H, <sup>7</sup>Li and <sup>13</sup>C NMR spectra in C<sub>6</sub>D<sub>6</sub>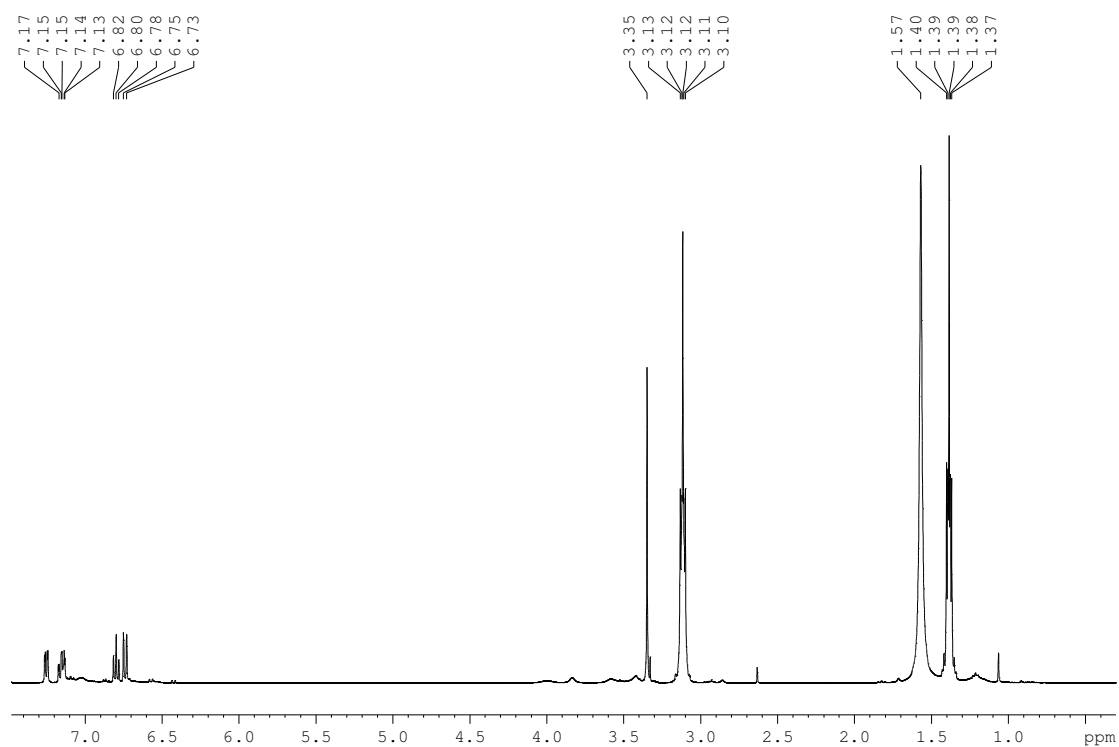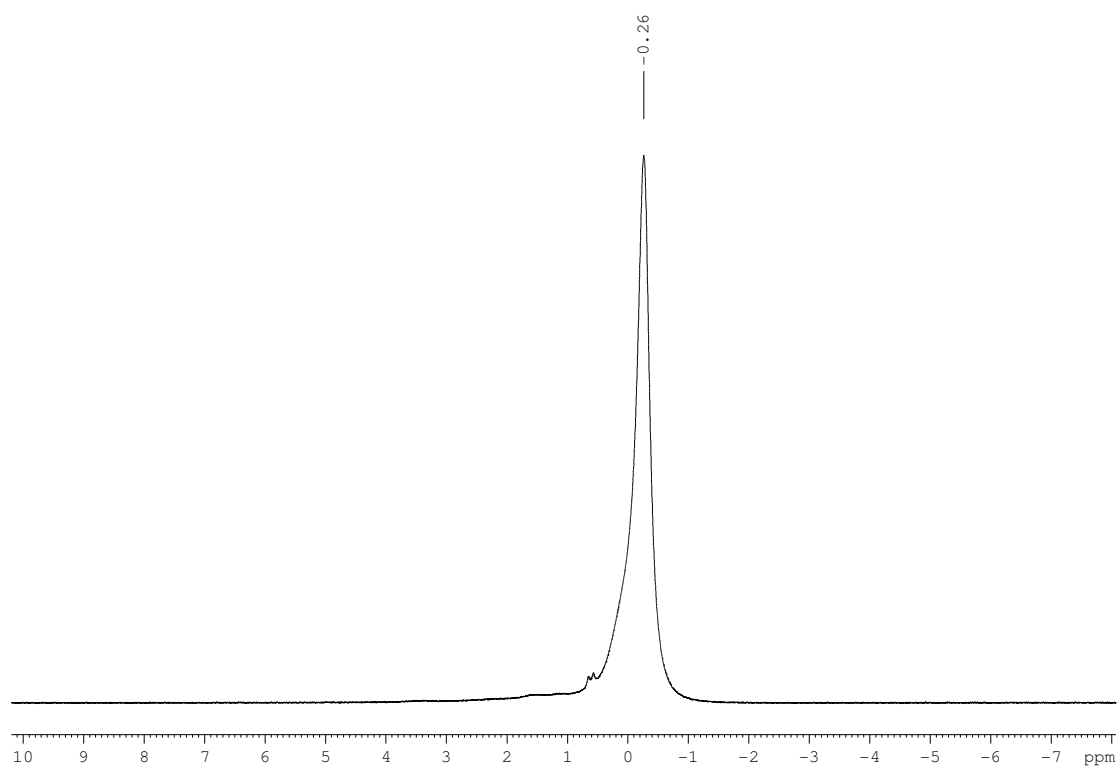

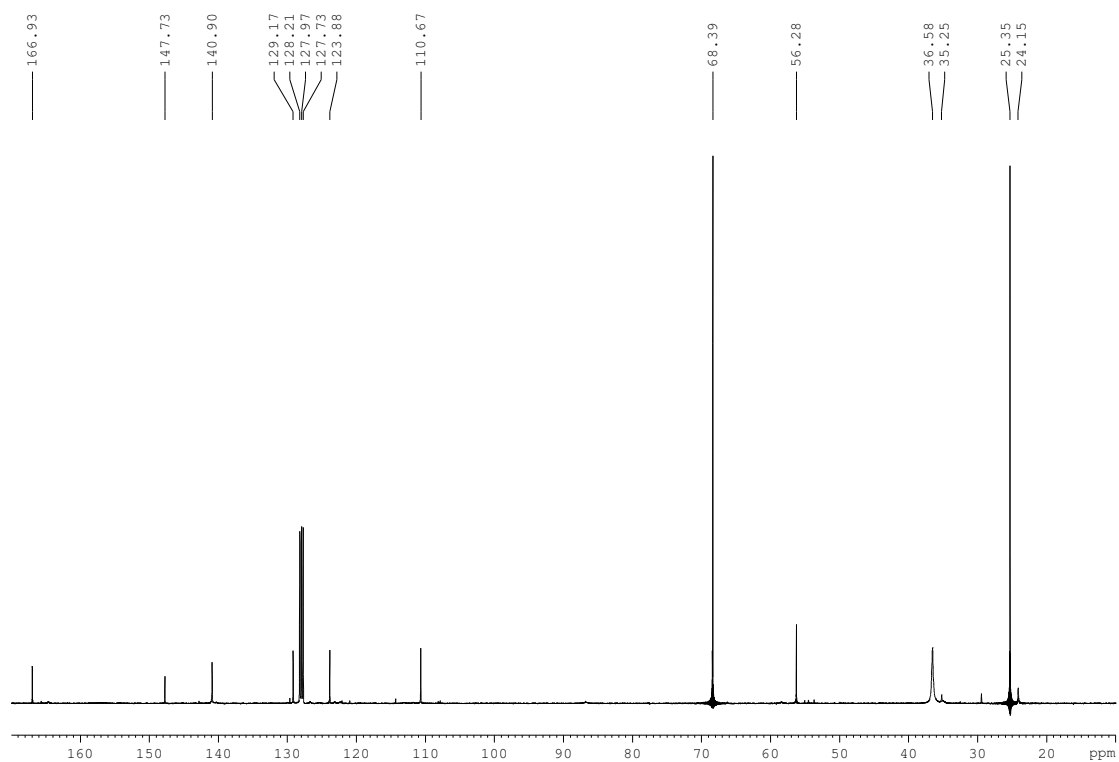**Compound [(PMDETA)Li(C<sub>6</sub>H<sub>4</sub>-OMe)(<sup>t</sup>Bu)Zn(<sup>t</sup>Bu)](8)** $^1\text{H}$ ,  $^7\text{Li}$  and  $^{13}\text{C}$  NMR spectra in  $\text{C}_6\text{D}_6$ 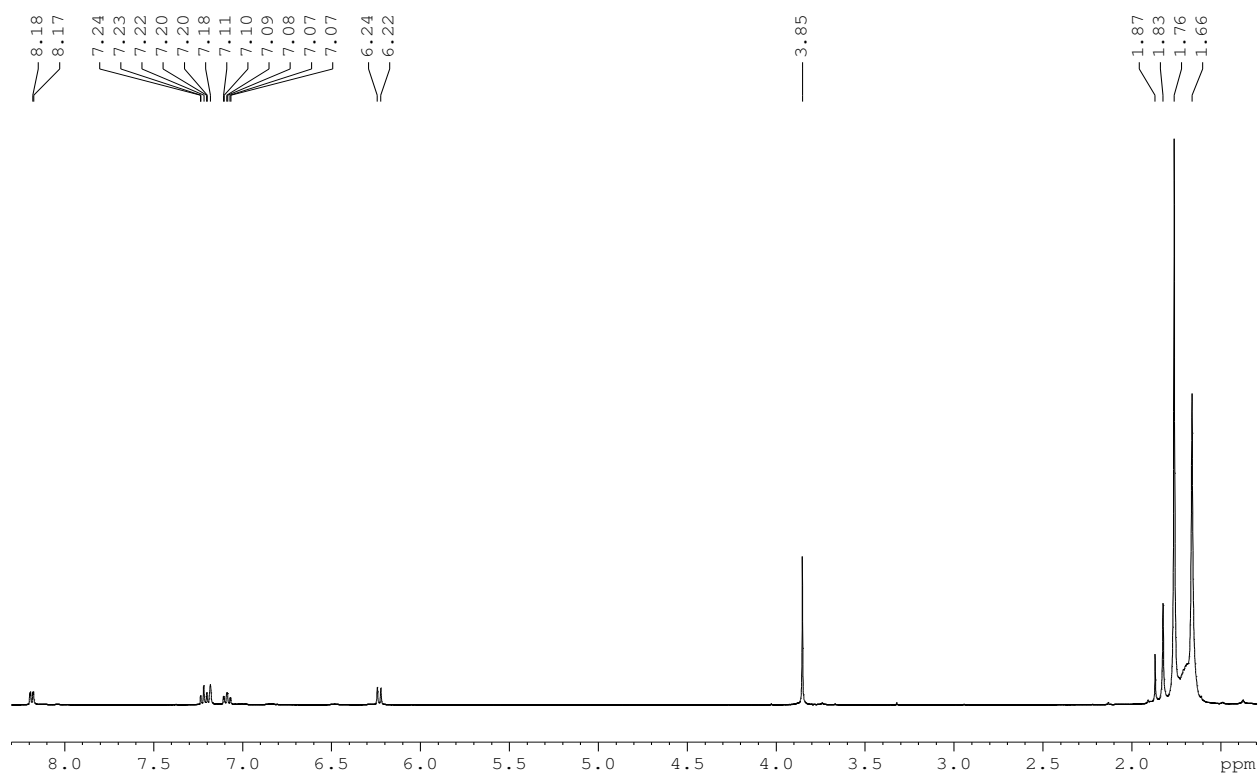

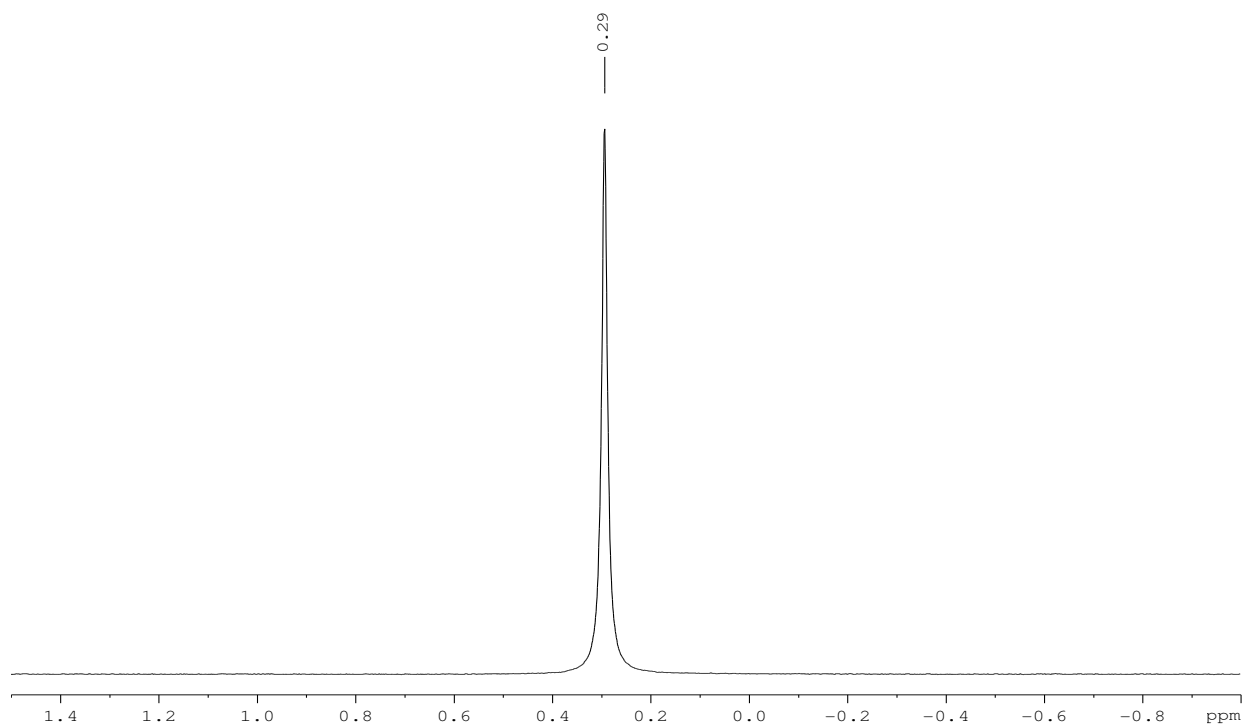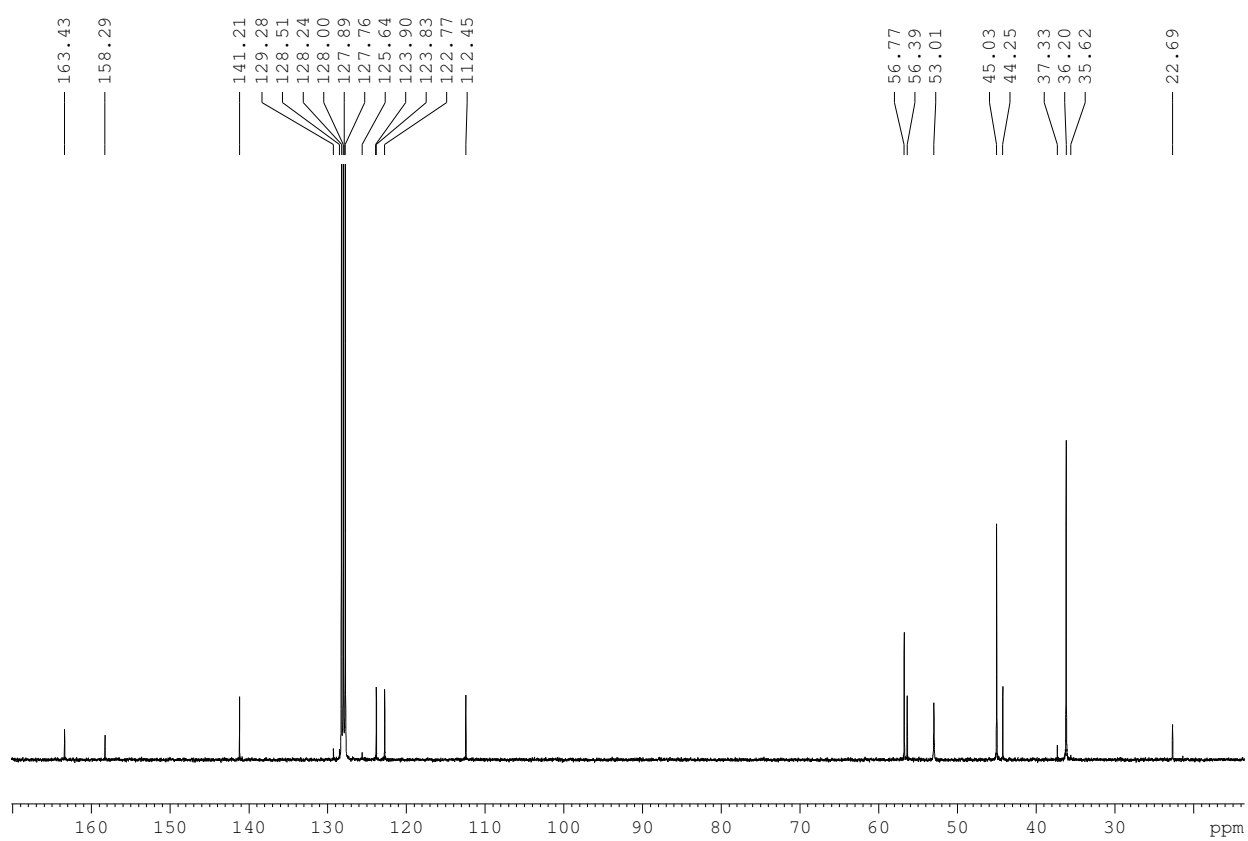

Compound [(THF)Li(TMP)(Me)Zn(Me)](9)

$^1\text{H}$ ,  $^7\text{Li}$  and  $^{13}\text{C}$  NMR spectra in  $\text{C}_6\text{D}_6$

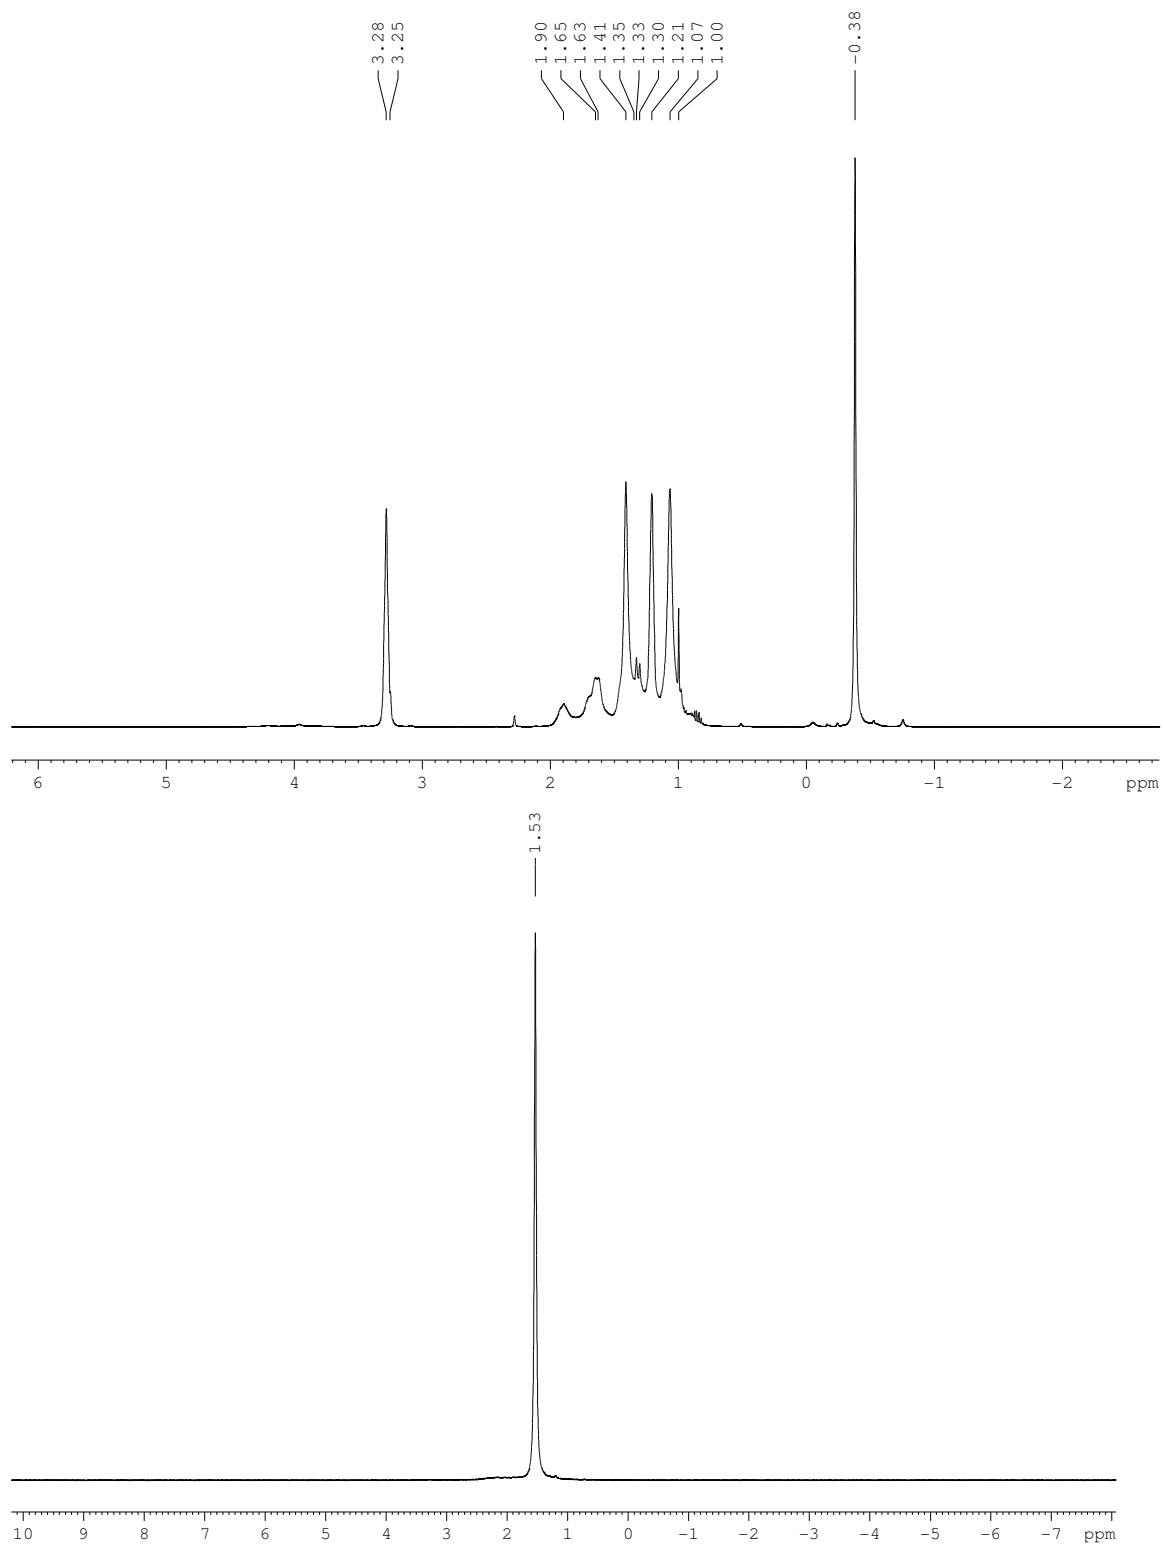

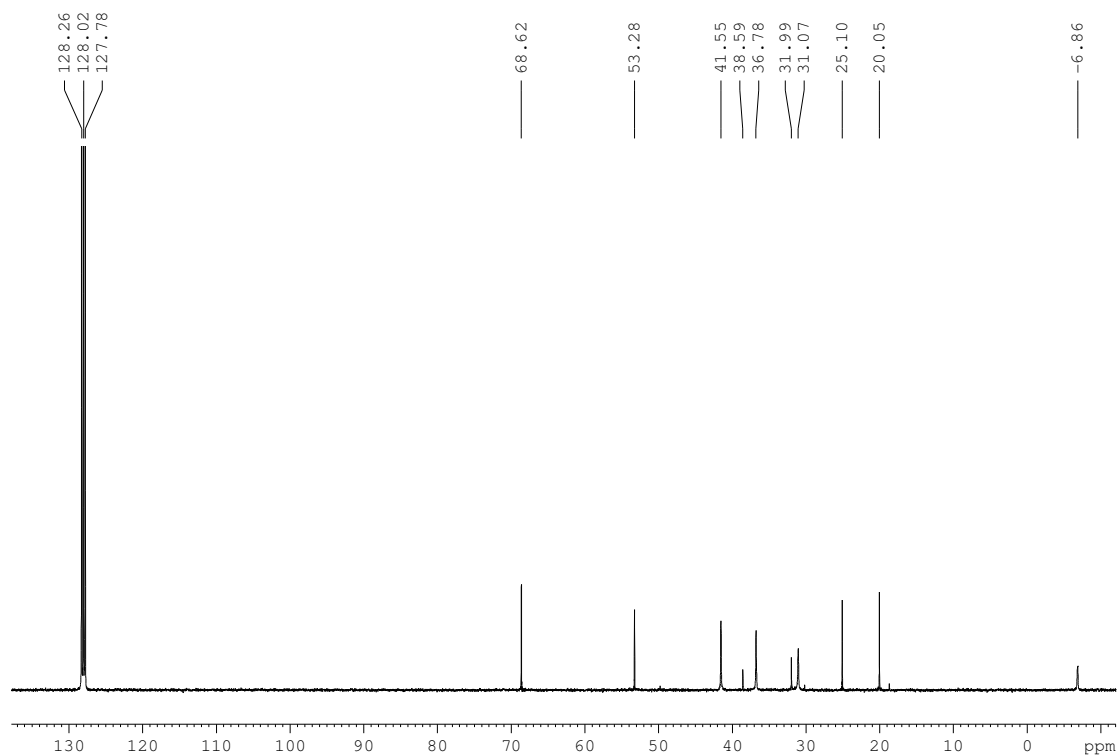

### Reactions monitored by NMR

**a) [(THF)<sub>3</sub>Li(C<sub>6</sub>H<sub>4</sub>-OMe)(<sup>t</sup>Bu)Zn(<sup>t</sup>Bu)](**7**) + TMP(H) in deuterated benzene**

**(i) <sup>1</sup>H NMR spectrum of **7** in C<sub>6</sub>D<sub>6</sub>:**

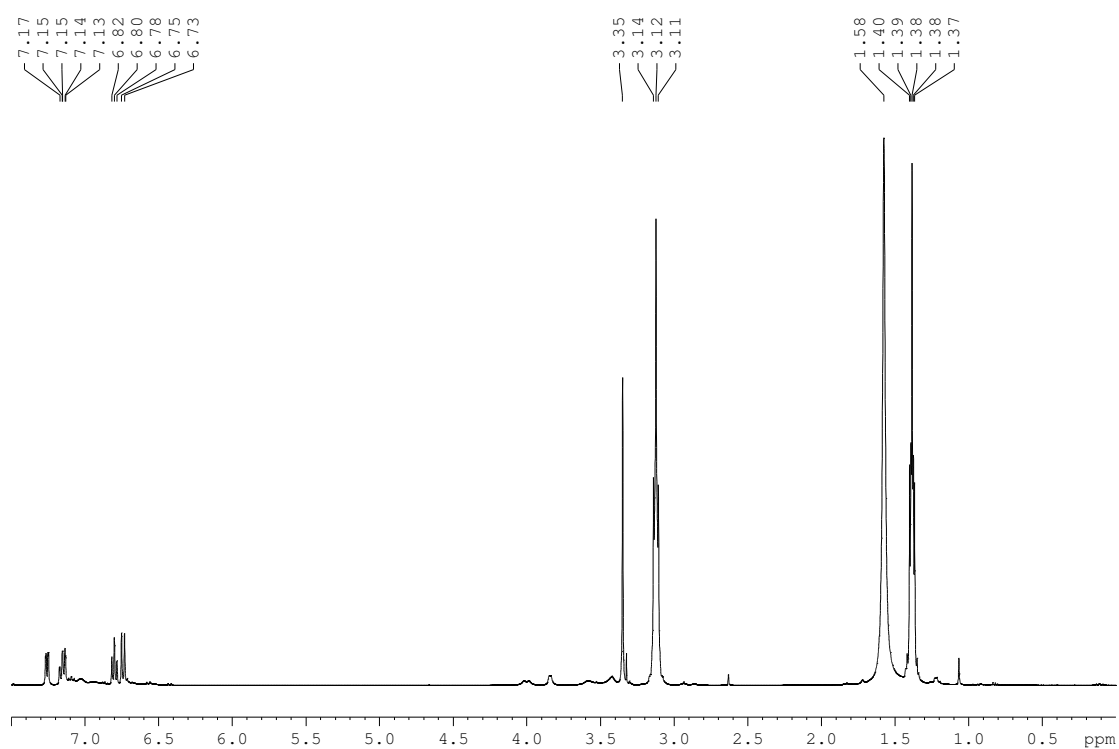

(ii)  $^1\text{H}$  NMR spectrum of **7** + TMP(H) in  $\text{C}_6\text{D}_6$  (1 hr)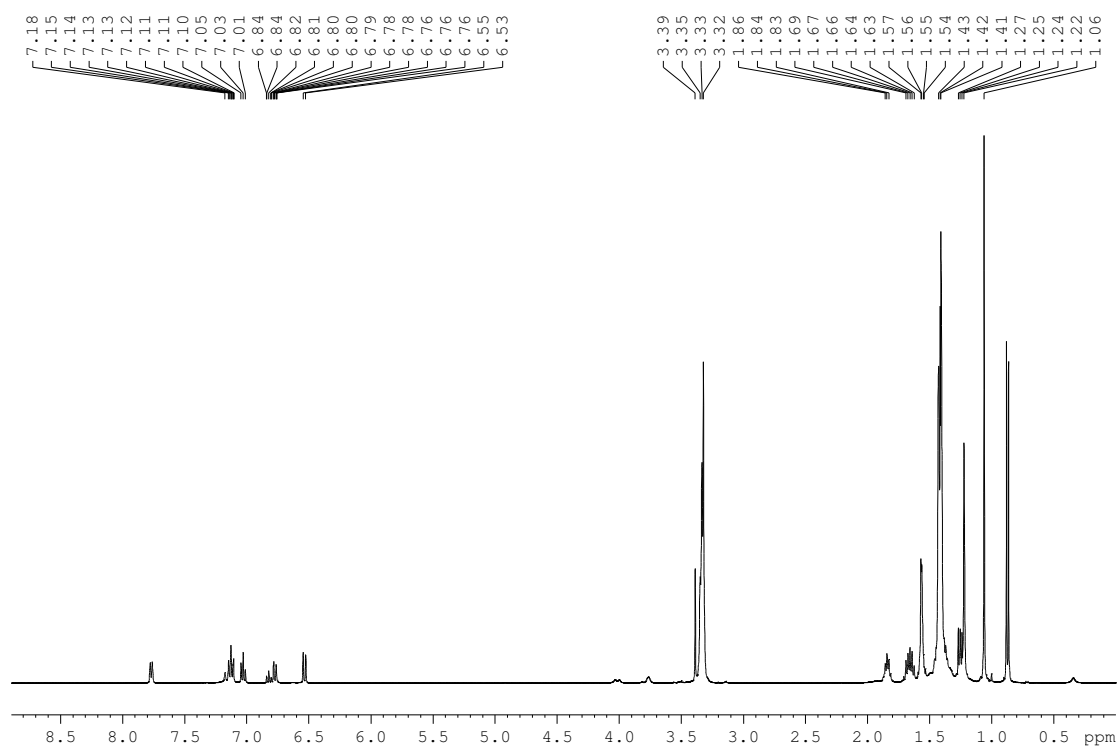(iii)  $^1\text{H}$  NMR spectrum of **7** + TMP(H) in  $\text{C}_6\text{D}_6$  (24 hrs)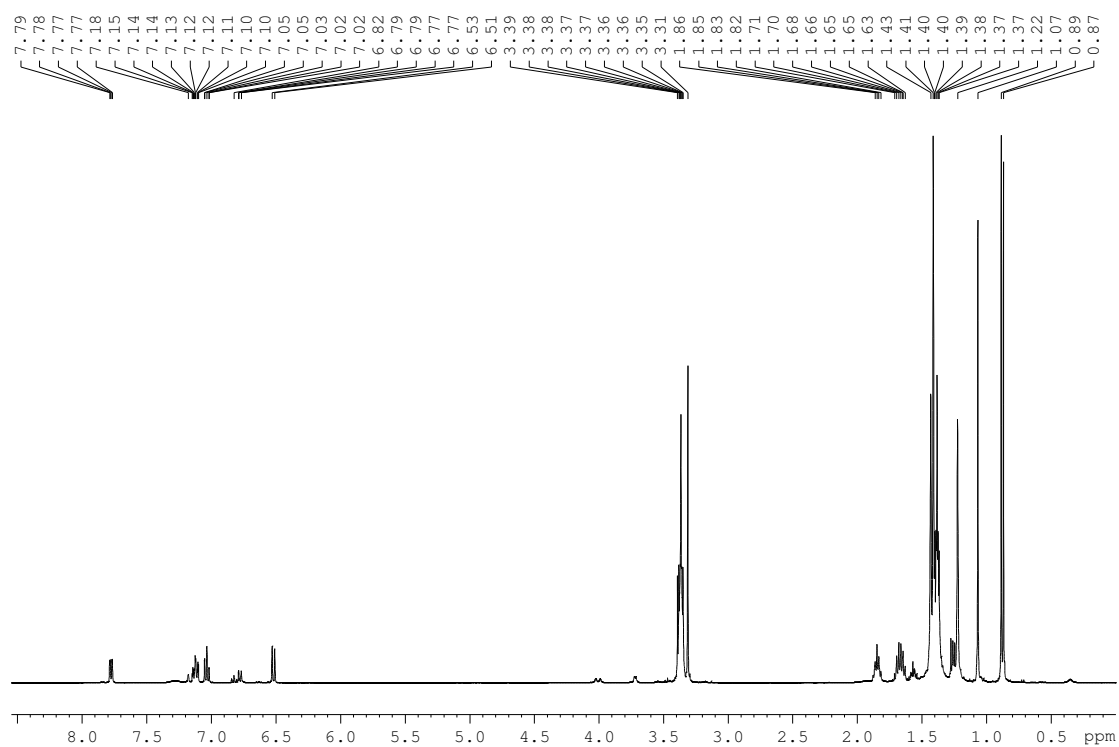

**(iv)** Enlarged aliphatic region of **(iii)**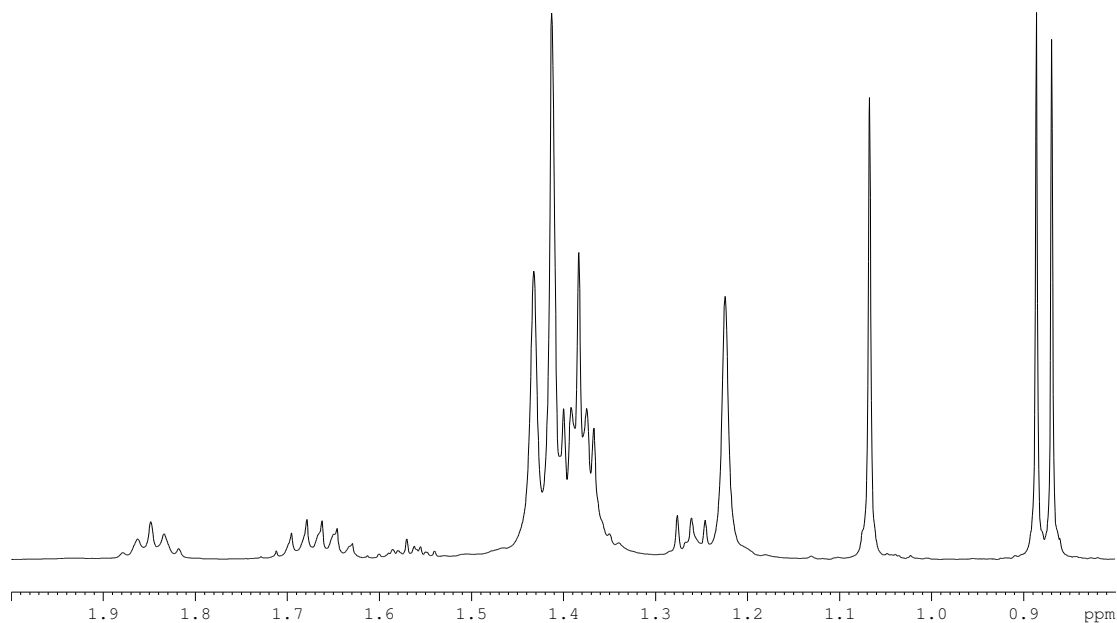**b)** [(THF)<sub>3</sub>Li(C<sub>6</sub>H<sub>4</sub>-OMe)(<sup>t</sup>Bu)Zn(<sup>t</sup>Bu)](**7**) + TMPH (2 hrs) in d<sup>8</sup>-THF**(i)** <sup>1</sup>H NMR spectrum of **7** in d<sup>8</sup>-THF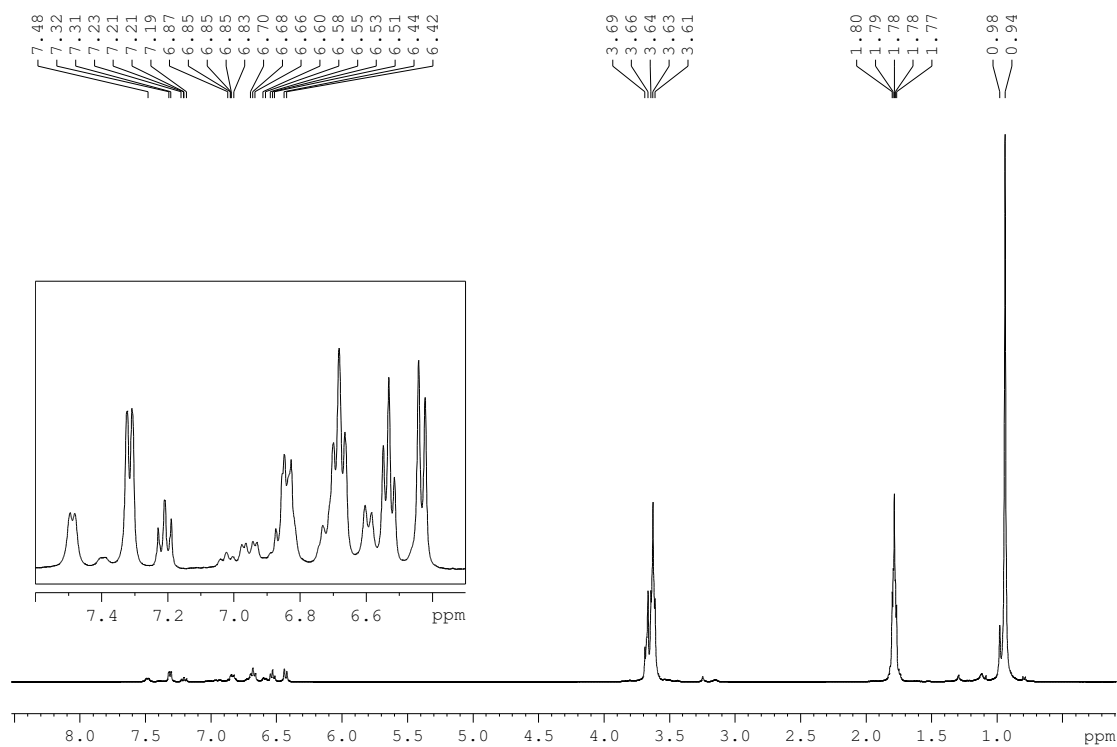**(ii)** <sup>1</sup>H NMR spectrum of **7** + TMP(H) in d<sup>8</sup>-THF (2 hrs)



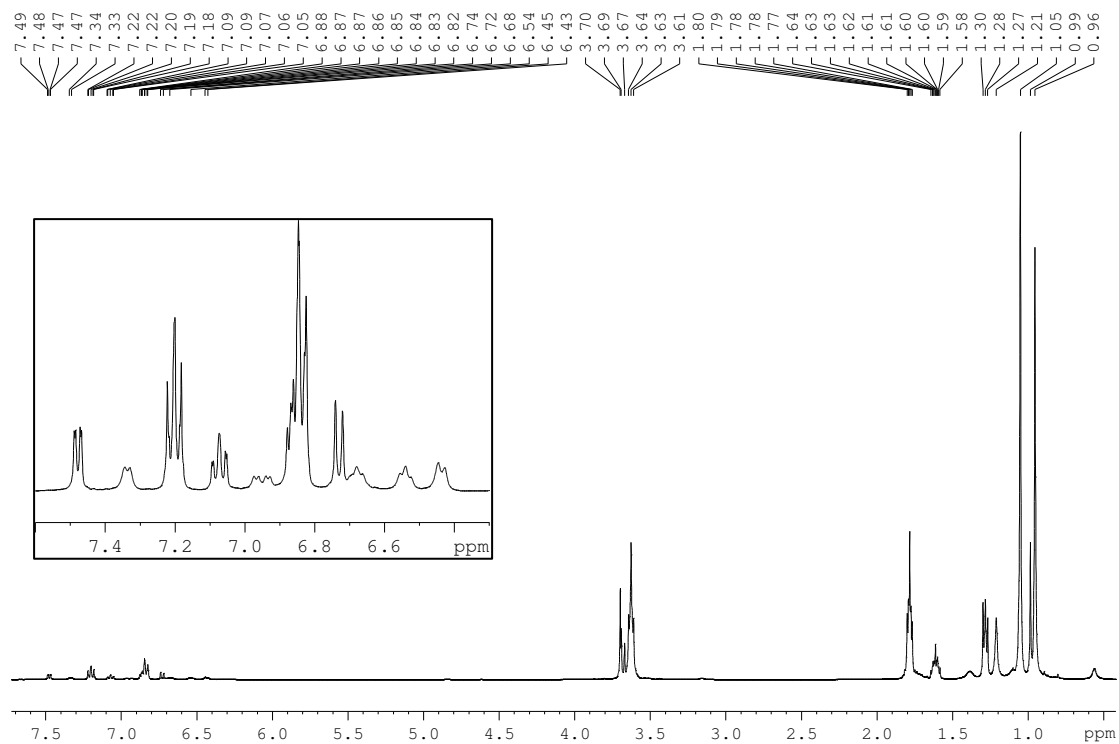

**c) [(THF)Li(TMP)(tBu)Zn(tBu)](1) + anisole in  $d^8$ -THF**

**(i)  $^1\text{H}$  NMR spectrum of **1** in  $d^8$ -THF**

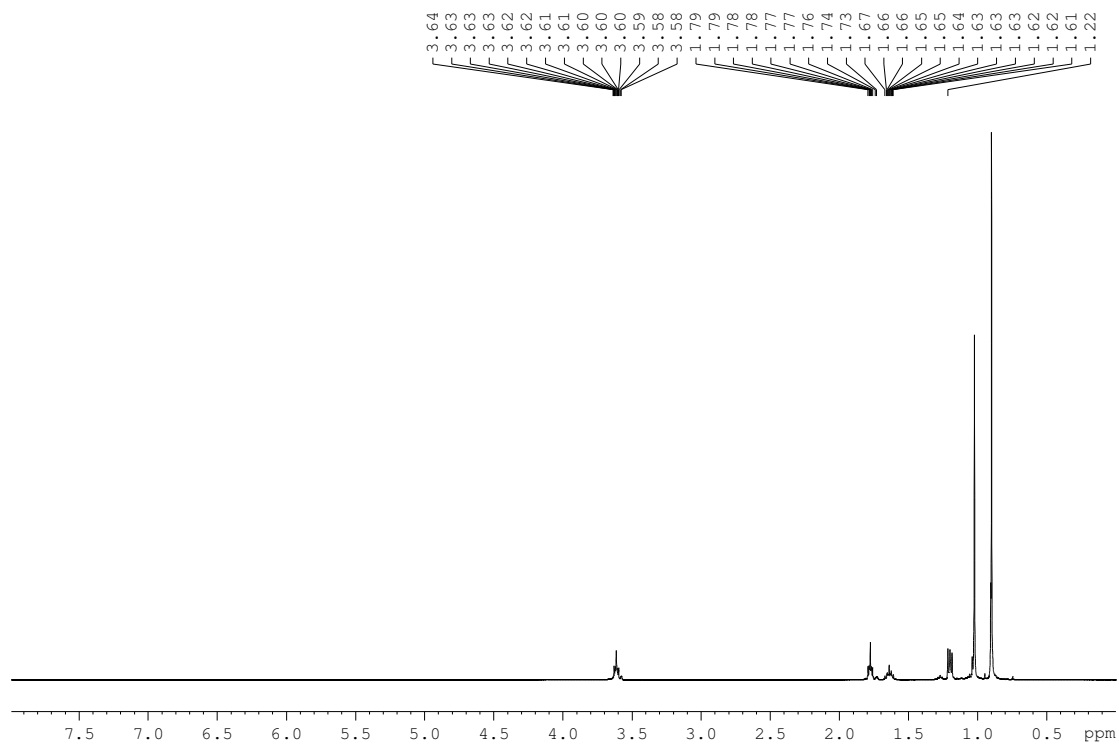

**(ii)  $^1\text{H}$  NMR spectrum of **1** + anisole (1 hr) in  $d^8$ -THF**

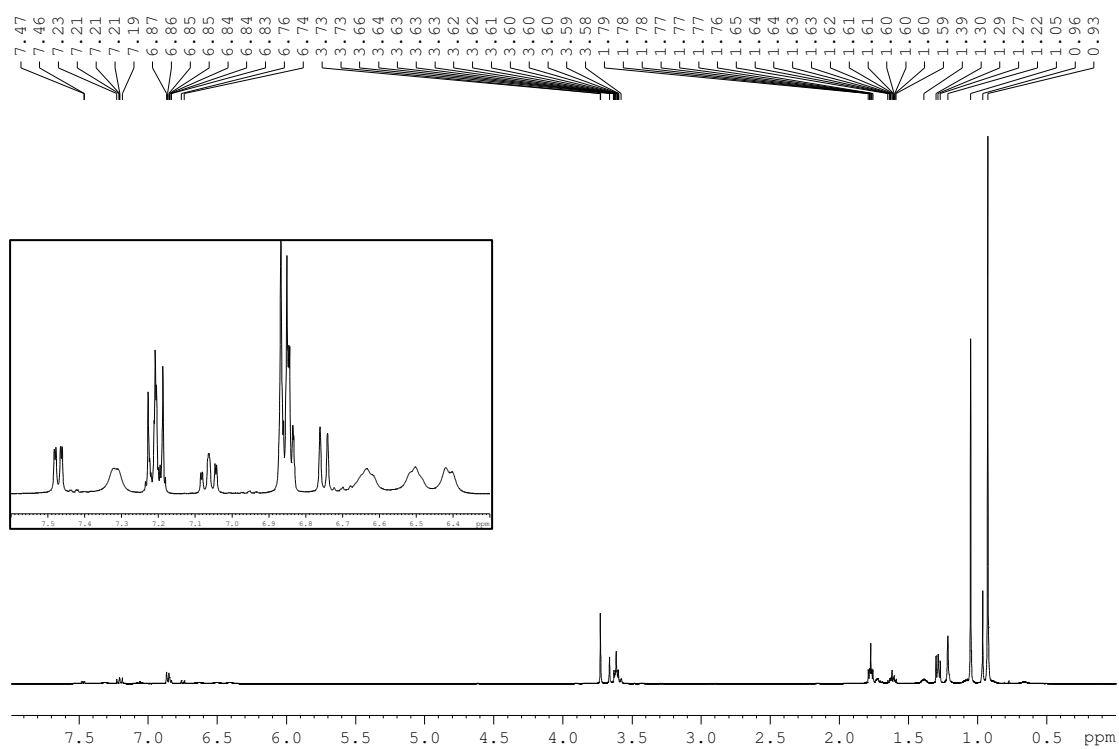

d) <sup>1</sup>H NMR spectra in d<sup>8</sup>-THF of :

(i) Compound 7

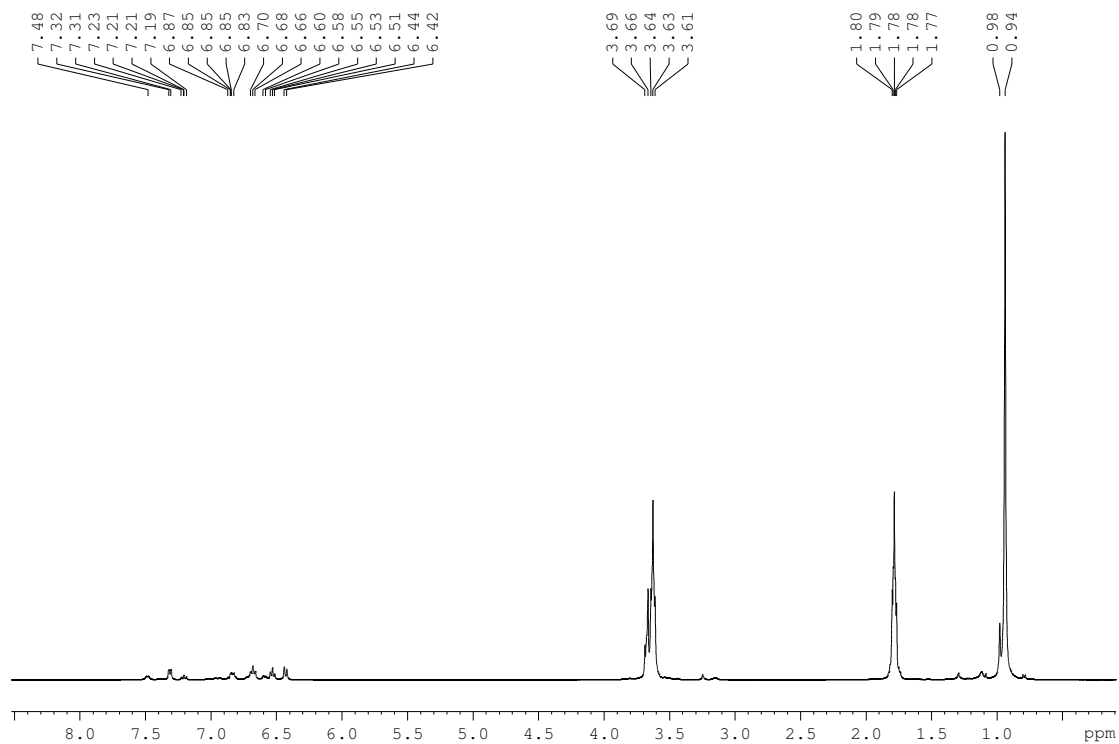

(ii) Compound 7 + TMPH (2 hrs)

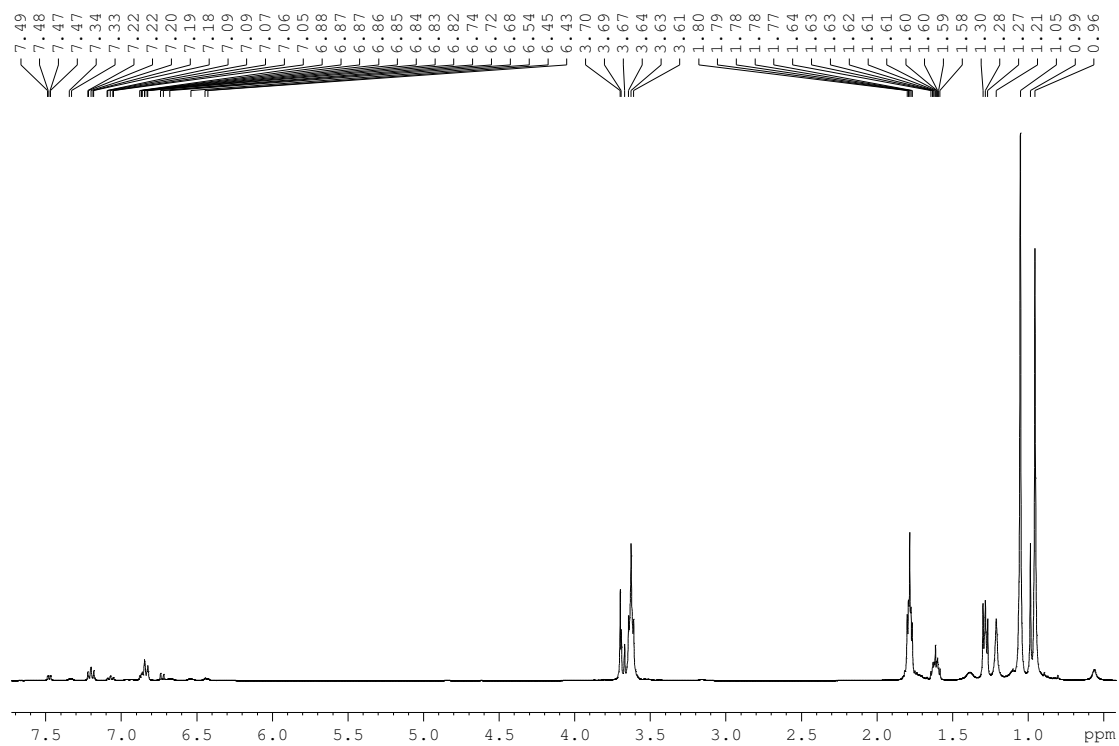

(iii) Compound 2

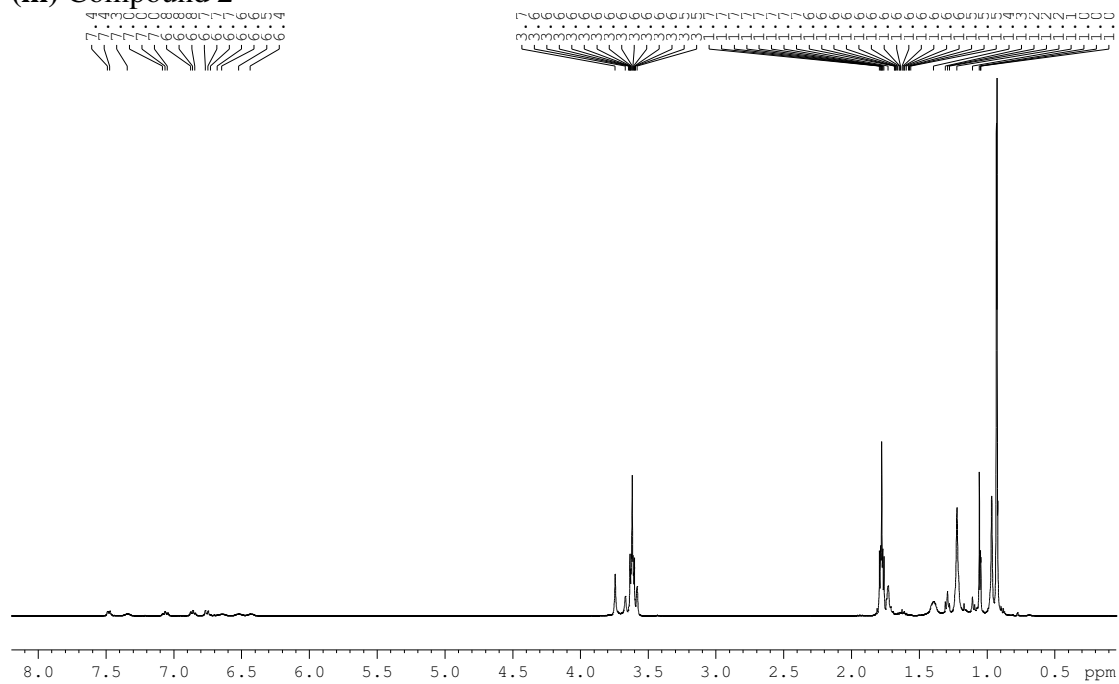

(iv) Compound 1+anisole

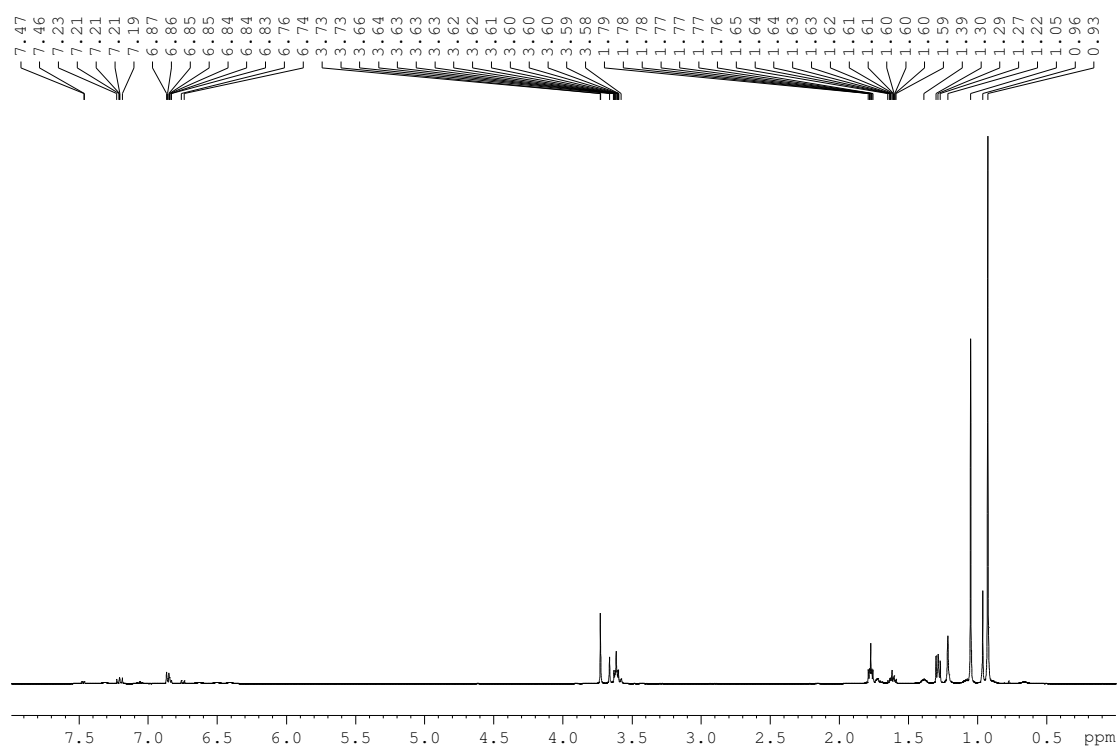

Supplement: ja8087168_si_002.pdf [file ja8087168_si_002.pdf]
